1 **Patient-derived glioblastoma cells (GBM) exhibit distinct biomechanical profiles associated**  
2 **with altered activity in the cytoskeleton regulatory pathway.**

3  
4

5 Amelia Foss<sup>a</sup>, Michele Zanoni<sup>b</sup>, Woong Young So<sup>a</sup>, Lisa Jenkins<sup>a</sup>, Luigino Tosatto<sup>c</sup>, Daniela  
6 Bartolini<sup>d</sup>, Michael M Gottesman<sup>a</sup>, Anna Tesei<sup>b\*</sup>, Kandice Tanner<sup>a\*</sup>

7  
8  
9  
10  
11

12 <sup>a</sup>Laboratory of Cell Biology, Center for Cancer Research, National Cancer Institute, National  
13 Institutes of Health

14 <sup>b</sup>Biosciences Laboratory, Istituto Scientifico Romagnolo per lo Studio e la Cura dei Tumori  
15 (IRST), IRCCS, Meldola, Italy

16 <sup>c</sup>Department of Neurosurgery, AUSL Romagna, M.Bufalini Hospital, Cesena, Italy

17 <sup>d</sup>Department of Human Pathology, AUSL Romagna, M.Bufalini Hospital, Cesena, Italy

18

19 \* Corresponding author information:

20 Dr. Kandice Tanner; Center for Cancer Research, National Cancer Institute, Building 37, Room  
21 2132, Bethesda, MD 20892; Ph: 260-760-6882; Email: [kandice.tanner@nih.gov](mailto:kandice.tanner@nih.gov)

22 Dr. Anna Tesei Biosciences Laboratory, Istituto Scientifico Romagnolo per lo Studio e la Cura dei  
23 Tumori (IRST), IRCCS, Meldola, Italy; Email: [anna.tesei@irst.emr.it](mailto:anna.tesei@irst.emr.it)

24

25 **ABSTRACT**

26           Glioblastoma multiforme (GBM) is the most commonly diagnosed brain cancer in adults,  
27 characterized by rapid proliferation and aggressive invasion into the stroma. Advances in our  
28 understanding of the molecular subtypes of GBM have provided attractive druggable targets.  
29 However, the high degree of heterogeneity both among patients and within individual tumors has  
30 proven a significant challenge for the development of effective therapies. We hypothesized that  
31 this heterogeneity is also represented in the mechanical phenotypes of GBM, as the physical  
32 properties of tumor tissue strongly influence elements of tumor progression including cell cycle  
33 regulation, migration, and therapeutic resistance. To assess these phenotypes, we employed optical  
34 trap-based active microrheology to determine the viscoelastic properties of patient-derived GBM  
35 cells in 3D hydrogels mimicking the brain ECM. We found that each GBM cell line had a distinct  
36 rheological profile as a function of treatment status, and cell lines could be further characterized  
37 by strong power law dependence describing intracellular viscoelastic behavior. Single-cell  
38 phenotyping according to power law dependence was able to identify subpopulations of cells  
39 within the treatment-resistant line. Finally, proteomic analysis indicated that altered mechanical  
40 profiles were associated with differential cytoskeletal regulation, particularly in actin- and myosin-  
41 binding pathways. This work suggests that evaluating mechanical properties may serve as a  
42 valuable strategy for the further stratification of these tumors, and encourages the investigation of  
43 cytoskeleton regulation as a potential therapeutic target for GBM.

## 44 **Introduction**

45           Glioblastoma multiforme (GBM) is the most lethal cancer of the central nervous system,  
46 and most patients succumb to the disease within 1-2 years after diagnosis[1]. Transcriptomic and  
47 histopathological analysis have determined that GBM tumors adopt a multitude of phenotypic,  
48 cellular, genetic, and epigenetic subtypes[2, 3]. These molecular sub-types are characterized by  
49 amplification, absence, or mutation of genes that encode for growth factor receptors, metabolic  
50 regulators, and known tumor suppressors[2, 3]. This wealth of molecular data provides attractive  
51 and actionable biomarkers. However, clinical trials based on this stratification have not yielded  
52 curative treatment[1]. Moreover, recent data have shown that these sub-types are plastic, as an  
53 interconversion of distinct states is observed during tumor evolution[3]. It is thought that treatment  
54 efficacy is obfuscated due to the multifactorial diversity found intratumorally and across patients.  
55 Thus, further stratification of “multiformes” may be needed to develop effective therapeutic  
56 interventions.

57           GBM plasticity may in part be due to specific components of the brain  
58 microenvironment[4-7]. The physical properties of the brain microenvironment have been shown  
59 to influence drug response and tumor growth[4, 8, 9]. In addition, motile GBM cells can remodel  
60 the surrounding matrix, which, in turn, increases motility [4, 8-11]. This dynamic coupling between  
61 cell and environment also changes the phenotype of the cells themselves[11, 12]. The combined  
62 viscous and solid behavior that defines the single cell mechanical phenotype may also be a viable  
63 target to assess phenotypic plasticity. This mechano-phenotype regulates the kinetics and diversity  
64 of enzymatic processes which in turn drive cell fate [13-15]. Subcellular components such as the  
65 cytoskeleton, nucleus and a copious distribution of cytoplasmic proteins, enzymes and solutes  
66 drive the viscoelastic behavior of single cells[13-17]. Thus, defining these mechanical states may

67 offer additional insight in what may drive the interchange between sub types in GBM. However,  
68 it is not known if single cells adopt distinct mechanical phenotypes as a function of subtype or  
69 within a given subtype for patient derived GBM cells.

70 Real-time mechanical mapping of GBM tumors in patients has been achieved using  
71 modalities based on magnetic resonance[18-20]. Using single and multi-frequency magnetic  
72 resonance elastography, correlations between mechanical properties and tumor grade and  
73 mutational status have been reported[21]. The technique has also been successful in resolving the  
74 relative importance of the fluidity for distinct brain tumors[18]. Intratumoral heterogeneity can be  
75 distinguished for regions corresponding to ~100s of cells. However, single cell resolution has not  
76 been demonstrated at this time *in vivo*. One strategy to address this knowledge gap would be a  
77 combined approach where one employs the use of biomimetic platforms that mimic the *in vivo*  
78 GBM microenvironment with that of single cell rheological modalities such as brillouin  
79 microscopy, and optical and magnetic tweezers. Using optical tweezer based active  
80 microrheology, we have previously shown that we can map the mechanical coupling of tumor  
81 cells embedded in distinct 3D extracellular matrix (ECM) hydrogels[16]. Here, we aimed to  
82 determine if patient derived GBM cells display heterogeneities in their mechanical phenotype  
83 similar to the molecular heterogeneity observed in patients.

84 We reasoned that the intratumor heterogeneity in clinical presentation and genetic  
85 characteristics also includes heterogeneity in mechanical phenotype and cytoskeletal dynamics,  
86 which may contribute to differing tumor progression and altered invasion profiles. To investigate  
87 this question, we embedded patient-derived GBM cells into 3D hyaluronic acid-based hydrogels  
88 to mimic the extracellular matrix environment of the brain. We determined that among three  
89 patient-derived GBM cell lines and a model cell line, each line had a distinct viscoelastic profile

90 indicating cell stiffness and hysteresivity, or how liquid- or solid-like a substance behaves.  
91 Moreover, we determined that within each cell line, a range of mechanical phenotypes is observed.  
92 However, classification of cells based on power law dependence revealed that a cell line obtained  
93 from a relapsed patient stratified into two distinct populations, whereas the treatment naïve cell  
94 lines showed single populations with varying widths of distribution. Immunofluorescence shows  
95 altered patterns of actin cytoskeletal organization among lines. Supporting these data, cytoskeletal  
96 regulation pathways, including cytoskeletal protein-binding and myosin-binding pathways are  
97 significantly altered among cell lines according to mass spectrometry analysis. Specifically,  
98 Myosin IIC, associated with cytoskeleton dynamics, cell adhesion, and tumor cell invasion, is  
99 differentially abundant among lines, and serves as a promising target for further investigation.

100

101

102

103

## 104 **Results**

### 105 **Mapping the intracellular heterogeneity of a single cell in 3D hyaluronic acid**

106 In optical trap (OT)-based rheology, local piconewton forces are applied to objects such as  
107 beads and organelles [22-24]. From the induced displacement of these objects, determination of  
108 the underlying local physical properties of the material can be achieved, with the caveat that the  
109 mesh size of the material is smaller than the probe. Thus, we first asked if we can map cytoplasmic  
110 heterogeneity using 1  $\mu\text{m}$ -diameter polystyrene beads as local sensors. To address this question,  
111 we employed a biomimetic model of the brain ECM microenvironment using the immortalized  
112 U87 GBM cell line. Cells were harvested and incubated in media supplemented with 1  $\mu\text{m}$ -  
113 diameter polystyrene beads. These cells were embedded in 3D hyaluronic acid hydrogels at  
114 densities that minimized nearest neighbor effects and ensured cells saw an isotropic distribution  
115 of matrix (Figure 1A). OT-based active microrheology was performed on intracellular beads with  
116 a total amplitude of oscillation of 200 nm (20nm per frequency ( $\omega$ )) at a power of 200mW at the  
117 back aperture over a range of frequencies spanning 7-15 kHz (Figure 1B). Using vis a vis  
118 calibration and FDT, we quantitated the complex modulus,  $G^*$  for each bead.  $G^* = |G^*| \exp(i\delta) =$   
119  $G' + iG''$ , can be then broken down into magnitude  $|G^*| = (G'^2 + G''^2)^{1/2}$ , in which  $G'$  represents  
120 the storage modulus and  $G''$  represents the loss modulus. We also assessed crossover frequency  
121 the two components, which indicates when the material properties transition from solid-like to  
122 liquid-like. We determined the local physical properties for three to five intracellular beads  
123 randomly distributed in the cytoplasm of individual cells (Figure 1C). We found that, for a given  
124 cell, the values of  $G'$  and  $G''$  for each bead varied from 6 Pa - 2 kPa for  $\omega$  ranging from 7-15kHz.  
125 For each bead, we observed a strong power law dependence for frequencies greater than 400Hz  
126 (HF) compared to a relatively shallow curve at frequencies below 400Hz (LF).

127 We then quantified the average mechanical properties for a given population of cells. First, the  
128 phenotype,  $G'$ ,  $G''$ , of each cell was determined by averaging measurements for each bead within  
129 a given cell (Figure 1D). We then averaged the values for thirty cells. We observed  $G'$  vs  $G''$  values  
130 of 18.8 - 602.5 Pa. and a crossover frequency at  $\omega = 2.73$  kHz. The distinct strong power law  
131 dependence following  $G', G'' \sim A(\omega)^b$  at  $\omega > 400$ Hz (HF) and shallow slope for frequencies below  
132 400Hz (LF) is maintained for an ensemble population of cells (Figure 1D).

### 133 **Patient derived GBM samples show distinct mechanical properties as a function of treatment** 134 **status**

135 We next examined the rheological properties of primary GBM cells. We chose three  
136 distinct cell lines: two that were treatment naïve and one that was derived from a relapsed tumor  
137 following radiation and chemotherapy (Figure 2A). We confirmed that the intracellular  
138 heterogeneity observed in the immortalized cell line was also present in primary cells  
139 (Supplemental Figure 1A-C). For each primary cell line, the mechanical phenotype is dominated  
140 by the elastic modulus where the crossover frequency ranged from 2.5-4kHz (Figure 2B). As  
141 observed with the immortalized cell line, values of  $G'$  and  $G''$  obeyed a power law at high  
142 frequencies in the primary lines. For the treatment naïve cell lines the value of exponent  $b$  ranged  
143 from 0.231-0.259 for  $G'$  and from 0.685-0.712 for  $G''$ . Similarly, for the treatment resistant line,  
144  $G'$  followed a weaker power law dependence with a value of 0.268 for the exponent  $b$ , and a  
145 stronger dependence for  $G''$  where the value of the exponent  $b$  is 0.688. The treatment-resistant  
146 line showed a markedly higher  $\omega_{\text{crossover}}$  at 4.06 kHz compared to the lower crossover frequencies  
147 of treatment-naïve lines ( $\omega_{\text{crossover}} = 2.94$  kHz, 2.95 kHz for GB40 and GB70, respectively) (Figure  
148 2B, Supplemental Figure 2B). We can then transform these data into plots of complex moduli.  
149 These plots show that the absolute value of  $G^*$  is dominated by the storage modulus whereas the

150 component from the loss modulus dominated the exponent of the power law dependence (Figure  
151 2C). To assess relative stiffnesses, we compared the  $\text{Log}_2$  ratios of  $G^*(\omega)$  for each cell line. From  
152 this analysis, one naïve cell line (GB70) was stiffer than the primary and immortalized cell lines  
153 (GB34 and GB40, and U87, respectively) (Figure 2D). The immortalized cell line showed a similar  
154 stiffness compared to treatment resistant cell line at high frequencies. As predicted, at the higher  
155 frequencies,  $G^*$  showed a stronger power law dependence where slopes ranged from 0.47 to 0.56  
156 (Figure 2C)[25]. To assign a mechanical phenotype to each of the cell lines, we examined the  
157 power law dependence of  $G^* \propto A\omega^b$  for each population, where materials that behave like semi-  
158 flexible polymers follow  $b=0.75$ , with  $b=0.5$  indicative of flexible polymers. We determined that  
159 treatment resistant cells behaved relatively more like flexible polymers compared to treatment  
160 naïve cells, with a  $b=0.47$  for the GB34 line compared to  $b = 0.48$  and  $b = 0.49$  for GB40 and  
161 GB70 lines, respectively.

### 162 **Single cell phenotyping using power law dependence identifies sub-populations in treatment** 163 **resistant GBM cells.**

164 GBM tumors are comprised of cells that show a diversity of phenotypes hence the use of  
165 “multiforme” in its tumor classification[1, 3]. Thus, we revisited our individual cell measurements  
166 to understand the distribution of the mechanical phenotypes. Among all cell lines, the individual  
167 cell measurements ranged from  $\sim 10 - 2500\text{Pa}$  for the full spectrum of frequencies, displaying  
168 significant heterogeneity within each line (Figure 3A). Having observed a robust power law at  
169 higher frequencies, we then calculated the individual exponents on a single cell basis (Figure 3B).  
170 We observed that the treatment resistant GB34 cells segregate into two populations, cells that  
171 behave like flexible and semi-flexible polymers. In contrast, the treatment naïve cell lines show  
172 single populations, one (GB40) that can be classified with phenotypes akin to flexible polymers



173 whereas another cell line (GB70) showed a broad distribution of states. In contrast, phenotypes of  
174 the immortalized cell line, U87 clustered more closely with phenotypes akin to semi-flexible  
175 polymers. We also observed these population dynamics in single cell analysis of intracellular  
176 hysteresivity, as resistant GB34 cells appear to segregate into two populations, GB70 cells show a  
177 broad distribution of characteristics, and the remaining treatment naïve lines cluster close together  
178 (Supplemental Figure 2A).

### 179 **GBM lines show distinct patterns of cytoskeletal organization.**

180 Mechanical phenotypes can be modulated by many factors such as treatment and culture  
181 conditions (i.e. primary vs immortalized). Thus, to assess what molecular mechanisms may  
182 regulate the differences in mechanical phenotypes, we focused on two of the treatment naïve cell  
183 lines. Differential analysis of the proteome revealed that Myosin IIB (MYH10) and IIC (MYH14)  
184 were upregulated in the GB40 cell line compared to the more heterogenous GB70 line (Figure 4A-  
185 B). Myosin IIB and IIC have been implicated as regulators of actin organization [26, 27]. In cells,  
186 actin-dependent regulation of cytoskeletal architecture provides a significant contribution to single  
187 cell mechanical properties. Thus, we assessed actin structures using immunostaining (Figure 4C).  
188 In the cell line that showed a narrow distribution akin to flexible polymers, we observed actin  
189 structures assembled into multi-foci within the cytoplasm with minimal cortical staining. However,  
190 in the second cell line that showed broad distribution of mechanical states, two distinct of actin  
191 structures and distributions were observed: 1) multi foci and 2) diffuse with strong cortical  
192 staining. Shape analysis of these cell lines also showed a difference in circularity, where GB40  
193 cells with stronger punctate staining were less spherical than the GB70 cells (Supplemental Figure  
194 3). Furthermore, pathway analysis indicates significant upregulation of cytoskeletal organization  
195 functions in the GB40 line, including actin and myosin binding (Figure 4D).

## 196 **Discussion**

197           In spite of our knowledge of molecular sub-types of GBM, curable treatment remains  
198 elusive[1]. Treatments include chemotherapy (temozolomide), radiation, and surgical resection,  
199 and occur only if these interventions do not impair cognition and quality of life [1, 28]. Phenotypic  
200 plasticity and microenvironmental elements are potent factors affecting drug sensitivity and  
201 efficacy [1, 3]. These factors are further complicated by intratumor and intertumoral  
202 heterogeneities in patients, which have thus far been challenging to model at high resolution [1-3,  
203 7, 29]. Our lab has previously measured the microscale mechanical coupling of tumor cells with  
204 that of a 3D biomimetic hydrogel [16]. Here, in an effort to understand mechanical heterogeneity  
205 in glioblastoma, we employed optical trap based active microrheology to characterize single cell  
206 mechanical phenotypes of patient derived primary GBM cells in a 3D brain mimicking matrix. We  
207 measured the single cell mechanophenotype of three patient-derived GBM primary cell lines and  
208 an immortalized cell line. Each of these had a distinct viscoelastic profile indicating cell stiffness  
209 and hysteresivity, or how liquid- or solid-like a substance behaves. Examination of power law  
210 dependence at higher frequencies revealed that the treatment resistant GBM cells can be grouped  
211 into two distinct populations, while most of the treatment naïve cell lines were centered on a single  
212 population and the other showed a broad distribution of states. For this cell line we determined  
213 that these cells adopted multiple states with different patterns of actin cytoskeletal organization.

214           The mapping of cellular mechanics has been achieved using multiple modalities including  
215 optical and magnetic tweezer based active rheology, passive rheology, atomic force microscopy  
216 and Brillouin microscopy[17, 30, 31]. Measurements of single cells in suspension can be  
217 performed using an optical stretcher and the high throughput, RT-DC system[32]. Previously,  
218 intracellular measurements obtained for yeast cells and normal mammalian cells ranging from

219 neurons and fibroblasts to breast epithelial cells have been achieved using AFM and Brillouin  
220 microscopy [33-35]. These values ranged from ~ 0.5-2kPa for Young's modulus and a calibrated  
221 longitudinal modulus respectively for a relatively narrow frequency range and non-overlapping  
222 regime[33-35], and interestingly, single cell measurements revealed a difference in mechanical  
223 properties due to differentiation status in fetal neural progenitor cells[14]. Here, we determined  
224 that the GBM cells are comparatively softer, where the measured complex moduli ranged from  
225 0.02-1kPa across our multiplexed 20 frequencies. This is in line with previous measurements using  
226 OT based microrheology of 2 micron beads in breast cancer cells in cultured on 2D micropatterned  
227 substrates and 1 micron beads of breast cancer cells cultured in 3D hydrogels [16, 36]. Moreover,  
228 our cells showed differences in stiffnesses due to treatment status, where treatment naïve cells  
229 were softer than the treatment resistant. This result is consistent with changes of mechanical  
230 phenotypes due to cell fates observed in comparison of differentiation status and drug  
231 resistance[14, 33]. This discrepancy between the OT measurements and the non-probe-based  
232 techniques can be due to four factors. First, mechanical phenotype is strongly dependent on the  
233 length and temporal scales of the technique. Second, mechanical properties obtained using probe-  
234 based techniques such as OT/MT and particle based passive rheology are highly dependent on  
235 probe size. Third, healthy, normally-programed cells are often "stiffer" than their cancerous  
236 counterparts. Last, mechanical properties are dependent on culture conditions, such as adherent or  
237 suspended culture, and dimension (2D vs 3D)[9, 37-39].

238       Access to broad frequencies allowed us to examine a dynamic range of complex behaviors.  
239 Our measurements compare well with previous measurements, where  $G^*$  is characterized by a low  
240 frequency elastic plateau regime and a high frequency liquid-like regime characterized by power-  
241 law frequency dependence[25, 38, 40]. In particular, actin cytoskeleton dynamics dominate the

242 mechanical response due to the size of the probe used in these experiments. At higher frequencies  
243 (>400Hz), the exponent from the formulaic power dependence is equal to 1 for purely viscous  
244 response. If contributions due to the cytoskeleton are the largest contributors, then these values are  
245 0.5, 0.75 and 0.875 for transverse and longitudinal modes of relaxation respectively [41]. We  
246 previously demonstrated that this exponent can vary from 0.2-0.8 for breast cells cultured in 3D  
247 hydrogels based on the chemistry of the hydrogel and perturbation of the cytoskeleton [16]. Similar  
248 examination was performed for cells cultured in 2D using high frequency AFM[40]. In these  
249 measurements, a double exponential fit was used for the elastic and liquid like regime. This value  
250 ranged from 0.15- 0.9 based on cell type and pharmacological inhibition of actin. In a similar  
251 comparison, an exponent of 0.41 was calculated for a breast cancer cell line[42]. Here, our  
252 measurements showed a range from 0.47-0.56.

253 We used this exponent to categorize the single cells in an effort to describe a  
254 complementary mechanical phenotype reminiscent of the molecular phenotypic classification used  
255 for GBM. In this work, we observed a difference due to treatment status. It remains to be seen,  
256 however, if the mechanical phenotype can be linked to mutation status as observed for MRE  
257 measurements[21]. Instead our data hint at the importance of factors that direct cellular mechanics,  
258 such as the actomyosin pathway, as potential regulators of the “multiformes” within the GBM  
259 population.

260 Non-muscle myosin proteins have been implicated in tumor proliferation and invasion.  
261 Briefly, decreased activity of Myosin IIA and IIB in GBM cells, particularly Myosin IIA, resulted  
262 in reduced tumor cell invasion *in vitro* and in a rodent model [43-45]. However, decreased Myosin  
263 IIA expression also enhanced proliferation in a manner dependent on the mechanical properties of  
264 the tissue microenvironment[45]. Our data, obtained using direct comparison of the proteome of

265 two representative treatment naïve cell lines, also revealed differential expression of cytoskeletal  
266 regulation pathways, including cytoskeletal protein-binding and myosin-binding pathways.  
267 Specifically, Myosin IIC, associated with cytoskeleton dynamics, cell adhesion, and tumor cell  
268 invasion within brain ECM, was differentially abundant among lines [26, 27, 46]. Our data  
269 presents additional evidence that these myosin isoforms may be key factors in GBM and serve as  
270 promising targets for further investigation.

271

## 272 **ACKNOWLEDGEMENTS**

273 This research was supported by the Intramural Research Program of the National Institutes of  
274 Health, the National Cancer Institute.

275

276

277

278

279

280

281

282

283

284

285

286

287

## 288 **Methods**

### 289 **Patient-derived glioblastoma cells**

290 Primary human glioblastoma cells were obtained directly from patient tumor specimens processed  
291 within 2 hours of surgery, as previously described[47]. Briefly, adult GBM tissues obtained from  
292 patients underwent surgical resection and sampled by a pathologist were dissected and digested in  
293 an enzyme mix solution. Patient-derived GBM cells were plated in NeuroCult NS-A serum-free  
294 medium (StemCell Technologies, Vancouver, BC, Canada) supplemented with 20 ng/ml of  
295 epidermal- and 10 ng/ml of fibroblast-growth factor (Sigma-Aldrich), 1% penicillin/streptomycin  
296 (GE Healthcare, Milan, Italy) and 2% amphotericin B (Euroclone) and maintained under hypoxic  
297 conditions (1% O<sub>2</sub>) in a humidified 37 °C, 5% CO<sub>2</sub> incubator. All the primary GBM cell lines  
298 were checked periodically for mycoplasma contamination using the MycoAlert™ Mycoplasma  
299 Detection Kit (Lonza, Basel, Switzerland). All Patient-derived biological samples were collected  
300 according to a protocol approved by Italian Local Ethics Committee (CE IRST IRCCS-AVR,  
301 protocol 2439/2018) and all the patients enrolled have signed an informed consent for the genetic  
302 analyses and for the use of the results for research purposes.

### 303 **Cell Culture**

304 U87 cells were grown and maintained as previously described at 37°C in normoxic conditions  
305 (20% O<sub>2</sub>, 5% CO<sub>2</sub>) in Dulbecco's Modified Eagle Medium (DMEM, 10% FBS, 1%  
306 Penicillin/Streptomycin, 1% L-glutamate)[48]. Patient-derived glioblastoma (GBM) cells (GB34,  
307 GB40, GB70) were grown and maintained at 37°C in hypoxic conditions (3% O<sub>2</sub>, 5% CO<sub>2</sub>) in  
308 NeuroCult™ NS-A Proliferation medium (STEMCELL Technologies, 05751) supplemented with  
309 1% Heparin Solution (STEMCELL Technologies, 07980), 2% Amphotericin B (Fungizone,  
310 EuroClone, ECM0009D), 10ng/mL bFGF (Sigma-Aldrich, FO291), 20ng/mL EGF (Sigma-

311 Aldrich, E9644), and 1% Penicillin/Streptomycin. Cells were passaged when 70-80% confluent,  
312 and media were changed regularly.

### 313 **Sample Preparation**

314 Prior to preparation, U87 cells were detached with 10mMEDTA for 15min at 37°C. GBM cells  
315 were mechanically detached or collected from suspension in growth media. Cells were pelleted,  
316 counted, and resuspended to a concentration of  $3 \times 10^6$  cells/mL. Polystyrene beads were added to  
317 the cell suspensions in a 1:20 ratio ( $1 \times 10^{10}$  stock solution, Life Technologies, FluoSpheres™  
318 Polystyrene Microspheres, F1308), and incubated with gentle mixing for 30-45 min at 37°C.  
319 Hyaluronic acid (HA) hydrogels were prepared concurrent with cell preparation. Frozen  
320 lyophilized thiol-modified hyaluronan (Glycosil®, Advanced BioMatrix, GS222) and  
321 polyethylene glycol diacrylate (Extralink-Lite®, Advanced BioMatrix, GS3008) were thawed and  
322 dissolved with degassed deionized water to 50mg/mL and 5mg/mL, respectively, and vortexed for  
323 45 min. For each sample, a volume of 40μL of cell-bead solution was added to 160μL Glycosil®  
324 and mixed thoroughly with a micropipette. Immediately thereafter, 40μL Extralink-Lite® solution  
325 was added and thoroughly mixed, such that the final concentration of the hyaluronan was  
326 33.3mg/mL. For optical trap measurements, samples were prepared by pipetting 33μL solution  
327 onto a glass microscope slide. A chamber was created by adding a coverslip to each side of the  
328 slide and across the top, fixed with double-sided tape. For immunofluorescence imaging, the gel  
329 solution was pipetted into plastic wells affixed to a microscope slide. The gels were allowed to  
330 polymerize for 1 hr. at 37°C, after which cell growth media was added to hydrate the samples.  
331 Polymerization continued overnight, and samples were measured or fixed at 24-28 h post  
332 preparation.

### 333 **Immunofluorescence Imaging**

334 Samples were fixed in 4% PFA for 2 h at room temperature. Samples were washed 3 x 10 min  
335 with PBS, and blocked and permeabilized for 1 h at room temperature in PBST (PBS containing  
336 0.1% Tween 20) + 0.5% Triton X-100. Samples were washed 3 x 10min with PBS, then incubated  
337 for 2 h at room temperature in a staining solution of PBST containing a 1:50 dilution of phalloidin  
338 and 1:1000 dilution of Hoechst 33342. Samples were washed with PBS 3 x 10 min prior to  
339 imaging. Samples were imaged on a Zeiss 780 laser scanning confocal microscope with Plan-  
340 Apochromat 40x/1.4 NA Oil DC M27 objective. Presented images are maximum intensity  
341 projections of 1 $\mu$ m z stacks.

### 342 **Quantification of Circularity**

343 Analysis was performed in FIJI using the built-in circularity plugin within the *Analyze Particles*  
344 command. Maximum intensity projections of the phalloidin channel of single cells (GB40 n = 9;  
345 GB70 n = 6) were thresholded and circularity was determined on a scale of 0-1 using the formula  
346  $circularity = 4\pi(area/perimeter^2)$ . Differences between cell lines were determined using an  
347 unpaired, two-tailed Student's *t* test.

### 348 **Mass Spectrometry**

349 GBM cells (GB40 and GB70) were seeded at concentrations of 250,000 per well in a 6 well plate  
350 and starved for 24 hrs replacing conventional media with growth factor free media. Cells were  
351 then washed twice with PBS 1X and lysed in 50  $\mu$ L of Mammalian Protein Extraction lysis buffer  
352 (Thermo Fisher Scientific) supplemented with phosphatase inhibitor cocktails 2 and 3 (Sigma  
353 Aldrich) and protease inhibitor (Sigma Aldrich) at 1:100. After 1 hour of incubation on ice,  
354 proteins were collected from supernatants after spinning down for 15 min at 12,000 x g. Collected  
355 supernatants were stored in 1.5 mL tubes at -80 degrees Celsius.



356 The filter-aided sample preparation (FASP) protocol [49] was used with minor  
357 modifications for the digestion of cell lysates. Briefly, lysates were reduced with 10mM DTT at  
358 55°C for 30min, then diluted in a Microcon YM-10 filter unit with 8 M urea in 100mM Tris-HCl  
359 (pH 8.5 [UA]) and centrifuged at 20°C for 30 minutes at 14,000 x g. Samples were washed with  
360 200  $\mu$ L UA, and protein was alkylated using 50mM in UA for 6 minutes at 25°C. This was followed  
361 by centrifugation at 20°C for 30min at 14,000 x g, and excess reagent was removed. Samples were  
362 washed with 3 x 100  $\mu$ L of 8 M urea in 100 mM Tris-HCl (pH 8.0 [UB]), then diluted to 1 M urea  
363 with 100 mM Tris-HCl (pH 8.0). Proteins were digested with trypsin at a ratio of 1:100 trypsin to  
364 protein w/w overnight at 37°C. Recovery of tryptic peptides was performed by centrifugation at  
365 20°C for 30 minutes at 14,000 x g, then washing the filter with 50  $\mu$ L 0.5 M NaCl. Peptides were  
366 desalted and acidified using a C18 SepPak cartridge (Waters, Milford, MA) and dried using  
367 vacuum concentration (Labconco, Kansas City, MO). Dried peptides were fractionated by high pH  
368 reversed-phase spin columns (Thermo Fisher Scientific), lyophilized, and solubilized in 4%  
369 acetonitrile and 0.5% formic acid in water. Fractions were separated on a 75  $\mu$ m x 15 cm, 2  $\mu$ m  
370 Acclaim™ PepMap™ reverse phase column (Thermo Fisher Scientific) with an UltiMate™ 3000  
371 RSLCnano HPLC (Thermo Fisher Scientific) at a flow rate of 300 nL/min. Online analysis was  
372 performed by tandem mass spectrometry using an Orbitrap Fusion™ mass spectrometer (Thermo  
373 Fisher Scientific). Peptides were eluted into the spectrometer in linear gradients from 96% mobile  
374 phase A (0.1% formic acid in water) to 35% mobile phase B (0.1% formic acid in acetonitrile)  
375 over a period of 240 minutes. The Orbitrap mass analyzer was set to acquire data at 120,000  
376 FWHM resolution, from which parent full-scan mass spectra were collected. Ions were isolated in  
377 the quadrupole mass filter, then fragmented in the HCD cell (normalized energy 32%, stepped  $\pm$   
378 3%). Product ions were then analyzed in the ion trap.

379 Mass spectrometry data and label-free quantification were performed using the MaxQuant  
380 version 1.5.7.4 [50, 51]. Parameters were set as follows: variable modifications – methionine  
381 oxidation and N-acetylation of protein N-terminus; static modification – cysteine  
382 carbamidomethylation; first search performed using 20 ppm error; main search performed using  
383 10 ppm error. Maximum of two missed cleavages; protein and peptide FDR threshold of 0.01; min  
384 unique peptides 1; match between runs; label-free quantification with minimal ratio count 2. The  
385 Uniprot human database from November 2016 (20,072 entries) was used to identify proteins, and  
386 statistical analysis was performed using Perseus version 1.5.6.0 [52]. Contaminants, reversed  
387 sequences, and proteins quantified in only one of three experimental replicates were removed.  
388 Label-free quantification values were base 2 logarithmized, and missing values were imputed from  
389 a normal distribution of the data. A two-way Student's *t* test was performed, with a p-value cutoff  
390 of 0.05. Fold change was determined relative to global median base 2 logarithmic values across  
391 all samples. The adjusted p value and negative logarithm of the adjusted p value were calculated  
392 using the Holm-Sidak method with an alpha <0.05 in GraphPad Prism 8.0.2. Pathway enrichment  
393 was performed using the Cytoscape version 3.7.2, wherein the top 150 most statistically significant  
394 differentially regulated proteins were entered into the STRING Enrichment application. Output  
395 was limited to Gene Ontology (GO) Function terms with an FDR <0.05. Pathways with at least  
396 four proteins are plotted, with the exception of the parent terms “binding” and “protein binding”  
397 which contained 112 and 73 proteins, respectively. Of these 150 proteins, the fifty most  
398 differentially abundant proteins are plotted as a heatmap.

### 399 **Optical Trap Instrumentation and Setup**

400 *Instrumentation and Setup*. Our home-built setup was used as previously described [22, 24]. The  
401 setup consists of a 1064 nm trapping beam (IPG Photonics, #YLR-20-1064-Y11) and a 975 nm

402 detection beam (Lumics, #LU0975M00-1002F10D) mounted on 5-axis adjustable mounts  
403 (Newport, New Focus 9081).

404 The trapping beam is steered by a dual-axis acousto-optic deflector (AOD) (IntraAction,  
405 DTD274HD6), which oscillates the trap at frequency  $\omega$ . Before entering the AOD, the trapping  
406 beam is linearly polarized by polarizing beam splitter cubes (Thorlabs, PBS23), and the beam is  
407 attenuated manually by half-wave plates (Thorlabs, WPH05M-1064) or electronically via analog  
408 output from a data acquisition (DAQ) card (National Instruments, PCIe-5871R FPGA). The AOD  
409 receives control signals from radio frequency generating cards (Analog Devices, #AD9854/PCBZ)  
410 with onboard temperature-controlled crystal oscillators (Anodyne Components, ZKG10A1N-  
411 60.000M), and the cards are controlled by the DAQ card. After passing through the AOD, an iris  
412 the doubly diffracted beam (i.e. 1<sup>st</sup> order in both transverse axes). To detect the displacement of  
413 the trapping beam position, a beam sampler mirror (Thorlabs, BSF10-C) and neutral density (ND)  
414 filter (Thorlabs, NENIR210B) direct a small amount of power (~1%) onto the trap-assigned  
415 quadrant photodiode (QPD) (First Sensor, QP154-QHVSD). The trap beam is expanded by a lens  
416 pair (Thorlabs, LA1509-C, 100mm; AC508-200-B, 200mm) and directed through a dichroic  
417 mirror (Chroma, T1020LPXR).

418 The detection beam is expanded by a lens pair (Thorlabs, LA1131-C, 50mm; AC508-200-  
419 b, 200mm) and directed through the dichroic mirror, where it is coupled into and collocated with  
420 the trapping beam. A third telescopic lens pair (Thorlabs, LA113-C, 50mm; LA1384-CA, 125mm)  
421 expands both beams, and a dichroic filter cube (Chroma, ZT1064rdc-2p) sends both beams into  
422 the objective (Nikon, MRDO7602 CFIPLAN-APO VC60XA WI 1.2 NA), such that the trapping  
423 beam slightly overfills the back aperture of the objective. A high numerical aperture (NA), long  
424 working distance (WD) condenser (Nikon, WI0.9 NA) collects light from the objective. A dichroic

425 mirror (Chroma ZT1064RDC-2P) directs the detection beam through a relay lens that is positioned  
426 to image the back focal plane of the condenser onto the detection-assigned QPD. A bandpass filter  
427 (Chroma, ET980/20X) removes the trapping beam from the path to the detection-assigned QPD.  
428 Time-correlated ‘trap’ and ‘detection’ QPD signals are collected by analog inputs of the DAQ  
429 card.

430 A charge-coupled device (CCD) camera is mounted on the optical table such that camera  
431 position can be adjusted to a plane conjugate to the trapping beam AOD, back aperture of the  
432 condenser, and detection QPD. The Hx-nm constant relating the AOD RF control signal (in Hz)  
433 to the beam displacement (in nm) is calibrated by attenuating and focusing the beam on a coverslip  
434 and imaging the backscattered beam on the CCD camera.

435 The alignment of the beams and the back focal plane interferometer is confirmed before  
436 each experiment, and laser power is measured at the microscope backport with a power meter  
437 (Fieldmate, Coherent) and adjusted to 100 mW at the half-wave plate. A flow chamber is  
438 constructed from a microscope slide and coverslide with double-sided tape (Scotch) and loaded by  
439 capillary action with polystyrene beads (Life Technologies, F1308) suspended in water. To ensure  
440 proper alignment, a bead is trapped and the trap beam is oscillated while bead position is viewed  
441 in real time from the detection QPD signal, and the beam-coupling dichroic and QPD position are  
442 adjusted until oscillations in both transverse axes are centered on the QPD. A thermal power  
443 spectrum is recorded and fitted to a Lorentzian function to calculate the viscosity of the water to  
444 confirm system calibration. Before measurement, the camera pixel coordinates of the trap beam’s  
445 position are found by fitting a centroid to the intensity of an image collected of a trapped, stationary  
446 bead in water.

447 **Sample Measurement.** The condenser is placed in Kohler illumination and the sample is placed in  
448 focus. The bead of interest is positioned precisely in the center of the trap by scanning it through  
449 the detection beam in three dimensions using a piezo XYZ nanopositioning stage (Prior,  
450 #77011201) while voltages are recorded from the QPD. The characteristic V-nm relation,  $\beta$ , of  
451 QPD voltage vs. position was calibrated in situ by fitting the central linear region of the detector  
452 response to scanning the bead through the detection beam in the direction of the oscillations, giving  
453  $\beta$  in V-nm, as previously described [24]. Once the bead is correctly positioned, the trap beam is  
454 oscillated while both trap and detection QPD signals are recorded. The oscillation is multiplexed  
455 as a superposition of sine waves of differing phase and frequency, with the same amplitude (25.4  
456 nm) at each frequency. Frequencies are prime numbers, in the range of 3Hz-15kHz, to avoid  
457 interference. Four phases are interlaced to minimize the total amplitude of the composite  
458 waveform. The waveform is pulsed for 2 s, followed by 2s with the trap stationary to obtain active  
459 and passive spectra, respectively, and the sequence is repeated 7 times. Control and data collection  
460 were conducted in custom programs (National Instruments, LabVIEW).

461 **Determination of Mechanical Properties.** The optical trap stiffness is determined *in situ* from the  
462 active and passive power spectra using the active-passive calibration method [53, 54]. The linear  
463 viscoelastic mechanical response of the material is modeled by a generalized Langevin equation  
464 with additional force terms (a harmonic term accounting for the attractive potential of the optical  
465 trap and an acceleration memory term accounting for the elastic in-phase response) [54-57].  
466 Mechanical response for undriven motion is described as  $m\ddot{x}_U(t) = F_{random}(t) - kx_U(t) -$   
467  $\int_0^\infty \gamma_{1,U}(\tau)x_U(t-\tau)d\tau - \int_0^\infty \gamma_{2,U}(\tau)\dot{x}_U(t-\tau)d\tau$ , where  $t$  is time,  $\tau$  is correlation time,  $x_U(t)$ ,  
468  $\dot{x}_U(t)$ , and  $\ddot{x}_U(t)$  respectively the undriven bead position, velocity, and acceleration,  $F_{random}(t)$  is the  
469 Brownian force,  $k$  is the optical trap stiffness,  $m$  is the bead mass, and  $\gamma_{1,U}(\tau)$  and  $\gamma_{2,U}(\tau)$  are

470 respectively the real and imaginary parts of the undriven friction relaxation spectrum. Driven  
 471 motion is described similarly as  $m\dot{x}_D(t) = F_{random}(t) - k(x_D(t) - x_L(t)) - \int_0^\infty \gamma_{1,D}(\tau)x_D(t - \tau) -$   
 472  $\int_0^\infty \gamma_{2,D}(\tau)\dot{x}_D(t - \tau)d\tau$ , where  $x_D(t)$ ,  $\dot{x}_D(t)$ , and  $\ddot{x}_D(t)$  respectively the undriven bead  
 473 position, velocity, and acceleration,  $x_L(t)$  is the position of the optical trap, and  $\gamma_{1,D}(\tau)$  and  $\gamma_{2,D}(\tau)$   
 474 are respectively the real and imaginary parts of the driven friction relaxation spectrum. The  
 475 fluctuation dissipation theorem identifies the undriven and driven friction relaxation spectra such  
 476 that  $\gamma_{1,U}(\tau) = \gamma_{1,D}(\tau)$  and  $\gamma_{2,U}(\tau) = \gamma_{2,D}(\tau)$ , according to Onsager's regression hypothesis.

477 The friction relaxation spectrum is related to the active power spectrum  $R_L(\omega)$  by the  
 478 equation  $\gamma D(\omega) + i\omega m = \frac{k}{i\omega} \left( \frac{1}{i\omega R_L(\omega)} + 1 \right)$  with probe frequency of the driving oscillation  $\omega$  in  
 479  $\text{rad}\cdot\text{s}^{-1}$ . The optical trap stiffness  $k = \frac{\text{Re}\{R_L(\omega)\}}{P_u(\omega)}$  is determined from the real part of the active power  
 480 spectrum  $R_L(\omega) = \frac{x_{dr}(\omega)}{-i\omega x_L(\omega)}$ , with  $x_L(\omega)$  and  $x_{dr}(\omega)$  as the Fourier transforms of the time series of  
 481 the positions of the trapping laser and driven bead, respectively, recorded while the trap is  
 482 oscillating; and the passive power spectrum  $P_U(\omega) = \langle |x_U(\omega)|^2 \rangle$ , where  $x_U(\omega)$  is the Fourier  
 483 transform of the time series of the undriven bead's thermally fluctuating position while the trap is  
 484 held stationary.

485 The generalized Stokes-Einstein relation yields the complex shear modulus as a function  
 486 of frequency,  $G^*(\omega)$ , of each bead's surrounding microenvironment according to the equation  
 487  $G^*(\omega) = \frac{i\omega\gamma_D(\omega)}{6\pi a}$ , with bead mass  $m$ , hydrodynamic radius  $a$ , and the friction relaxation spectrum  
 488  $\gamma_D(\omega)$ . The complex modulus,  $G^* = |G^*|e^{i\delta} = G' + iG''$ , has magnitude  $|G^*| = (G'^2 + G''^2)^{1/2}$  and  
 489 loss tangent  $\tan(\delta) = G''/G'$ , encoding rigidity and hysteresivity, respectively, such that  $G'$  represents  
 490 the storage modulus and  $G''$  represents the loss modulus.

491 **Data analysis and statistics.** For each cell analyzed, 3-5 beads were measured at different  
492 locations within the cell. Only cells exceeding ~30  $\mu\text{m}$  from the coverslip were analyzed. A  
493 minimum of 30 cells were analyzed per cell line. Data were analyzed using custom MATLAB and  
494 GraphPad Prism programs. Because the modulus magnitudes  $|G^*(\omega)|$ ,  $G'$ , and  $G''$  are log-normal  
495 distributed within a single bead, we characterize their central tendency and dispersion,  
496 respectively, by the maximum-likelihood estimate of the log-transformed mean  $\mu =$   
497  $\exp\left[\frac{1}{n}\sum_{i=1}^n \ln(x_i) + \frac{1}{2}\left[\frac{1}{n-1}\sum_{j=1}^n \left|\ln(x_j) - \frac{1}{n}\sum_{i=1}^n \ln(x_i)\right|^2\right]\right]$  and the maximum-likelihood  
498 estimate of the log-transformed variance  $\sigma^2 = \mu^2 \left[\exp\left[\frac{1}{n-1}\sum_{j=1}^n \left|\ln(x_j) - \frac{1}{n}\sum_{i=1}^n \ln(x_i)\right|^2\right]\right]$ . We  
499 assume normal distribution of beads within each cell and cells within the cell population, and thus  
500 characterize their central tendencies and dispersions respectively by arithmetic mean and variance.  
501 Active microrheology data are presented as mean complex, storage, or loss moduli vs frequency  
502 from 7 Hz to 15 kHz. The data are also presented as the log 2 transformed pair-wise normalization  
503 of the complex modulus, averaged across frequencies (mean  $\pm$  standard deviation). Data  
504 normalized to the complex modulus were analyzed by two-way ANOVA with Tukey's honestly  
505 significant difference post-test.

506 **Power Law Fitting.** Power law fitting was performed as previously described [16]. Briefly, non-  
507 linear regressions to fit the power law  $|G^*(\omega)| = A(\omega)^b$  were performed on the mean value at each  
508 frequency of  $|G^*(\omega)|$  from high frequencies only (400 Hz – 15 kHz). Fits were performed in  
509 MATLAB using the Curve Fitting Application, with nonlinear least-squares regression using the  
510 Levenberg-Marquardt algorithm and robust weighting with the Least Absolute Residual  
511 procedure. The power law exponent  $b$  is plotted for each individual cell, and  $b$  values among cell  
512 lines were analyzed by one-way ANOVA with Tukey's multiple comparisons test.

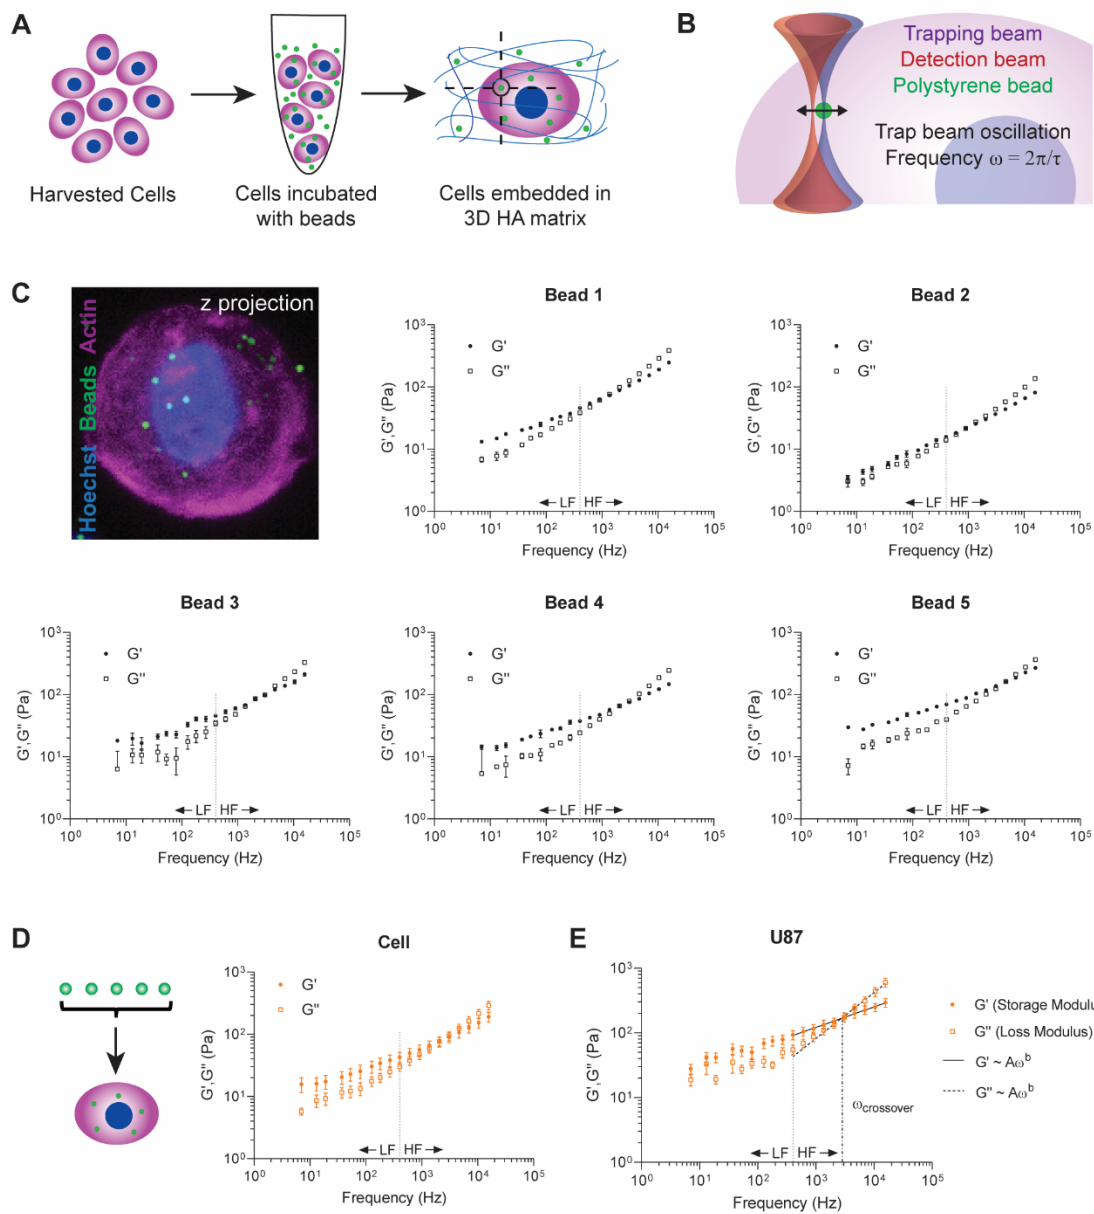

513

514



515 **Figure 1. Optical trap-based microrheology maps intracellular mechanic heterogeneity of**  
516 **GBM cells in biomimetic model of brain ECM**

517 **A)** Schematic of experimental design. U87 cells were harvested and incubated with 1  $\mu\text{m}$   
518 polystyrene beads in culture medium such that cells internalized the beads. Cells were then  
519 embedded in hyaluronic acid hydrogels and incubated overnight. Measurements of individual  
520 beads within cells were conducted 20-28h later. **B)** Schematic of optical trap measurement. Trap  
521 beam oscillation frequencies ranged from 7Hz-15kHz, and each bead underwent 7 measurements  
522 at each frequency. **C)** Micrograph of cell with internalized beads and  $G'$ ,  $G''$  values for 5 individual  
523 beads in a single representative U87 cell (mean  $\pm$  s.e.,  $n \leq 7$  measurements). Micrograph staining  
524 includes Hoechst (nucleus, blue), phalloidin (actin, magenta), and polystyrene beads (green). **D)**  
525 Schematic and rheological values for a single cell (mean  $\pm$  s.e.,  $n = 5$  beads). **E)** Average  $G'$ ,  $G''$   
526 values for U87 cell line (mean  $\pm$  s.e.,  $n = 30$  cells). Low frequencies (LF)  $< 400$  Hz. High  
527 frequencies (HF)  $> 400$  Hz. HF values fit to power law  $G', G'' \sim A\omega^b$ . For U87 cells, power law  
528 coefficients  $A$ , exponents  $b$ , and 95% confidence intervals are as follows. U87  $G'$ :  $A = 13.71$   
529  $(11.99, 15.43)$ ,  $b = 0.316$   $(0.3015, 0.3305)$ ; U87  $G''$ :  $A = 0.6091$   $(0.3175, 0.9007)$ ,  $b = 0.7095$   
530  $(0.6573, 0.7617)$ . The  $\omega_{\text{crossover}}$  is the point at which the  $G'$  and  $G''$  power law curves intersect. For  
531 U87 cells,  $\omega_{\text{crossover}} = 2.73$  kHz.

532

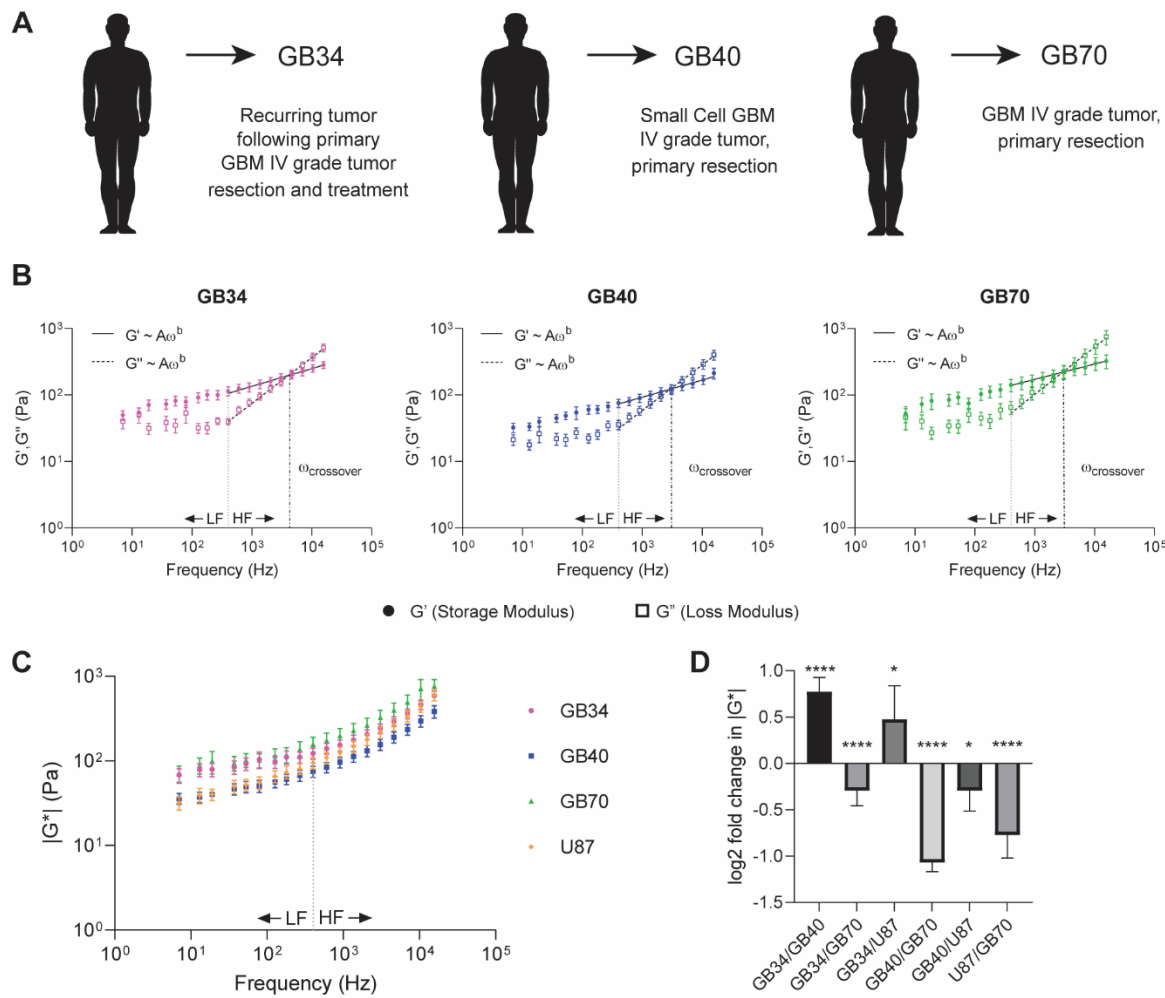

533

534

535 **Figure 2. Patient-derived GBM cell lines show distinct rheological profiles.**

536 **A)** Three primary GBM cell lines were derived from patients. The patient providing GB34 cells  
537 underwent standard resection and treatment, and the cells are derived from a biopsy of the recurring  
538 tumor. GB40 and GB70 cells are treatment-naïve. **B)** Average  $G'$ ,  $G''$  values for each primary  
539 GBM cell line (mean  $\pm$  s.e.,  $n \geq 17$  cells). Power law coefficients  $A$ , exponents  $b$ , and 95%  
540 confidence intervals are as follows. GB34  $G'$ :  $A = 21.23$  (18.18, 24.28),  $b = 0.2675$  (0.2508,  
541 0.2843); GB40  $G'$ :  $A = 15.49$  (12.73, 18.25),  $b = 0.2587$  (0.2378, 0.2795); GB70  $G'$ :  $A = 34.87$   
542 (29.88, 39.87),  $b = 0.2308$  (0.2139, 0.2477). GB34  $G''$ :  $A = 0.6455$  (0.4317, 0.8593),  $b = 0.6879$   
543 (0.6517, 0.724); GB40  $G''$ :  $A = 0.5129$  (0.3234, 0.7025),  $b = 0.6854$  (0.645, 0.7257); GB70  $G''$ :  
544  $A = 0.749$  (0.4735, 1.024),  $b = 0.7116$  (0.6715, 0.7517). The crossover frequencies for each line  
545 are as follows: GB34  $\omega_{\text{crossover}} = 4.06$  kHz; GB40  $\omega_{\text{crossover}} = 2.94$  kHz; GB70  $\omega_{\text{crossover}} = 2.95$  kHz.  
546 **C)** The magnitude of the complex viscoelastic modulus  $|G^*(\omega)|$  is plotted for primary and  
547 immortalized cell lines (mean  $\pm$  s.e.,  $n \geq 17$  cells). **D)** Pairwise  $\log_2$  ratios of  $|G^*(\omega)|$  across  
548 frequencies comparing all lines. Significance was determined using a 2-way ANOVA (\*  $p < 0.05$ ,  
549 \*\*  $p < 0.01$ , \*\*\*  $p < 0.001$ , \*\*\*\*  $p < 0.0001$ ).

550

551

552

553

554

555

556

557

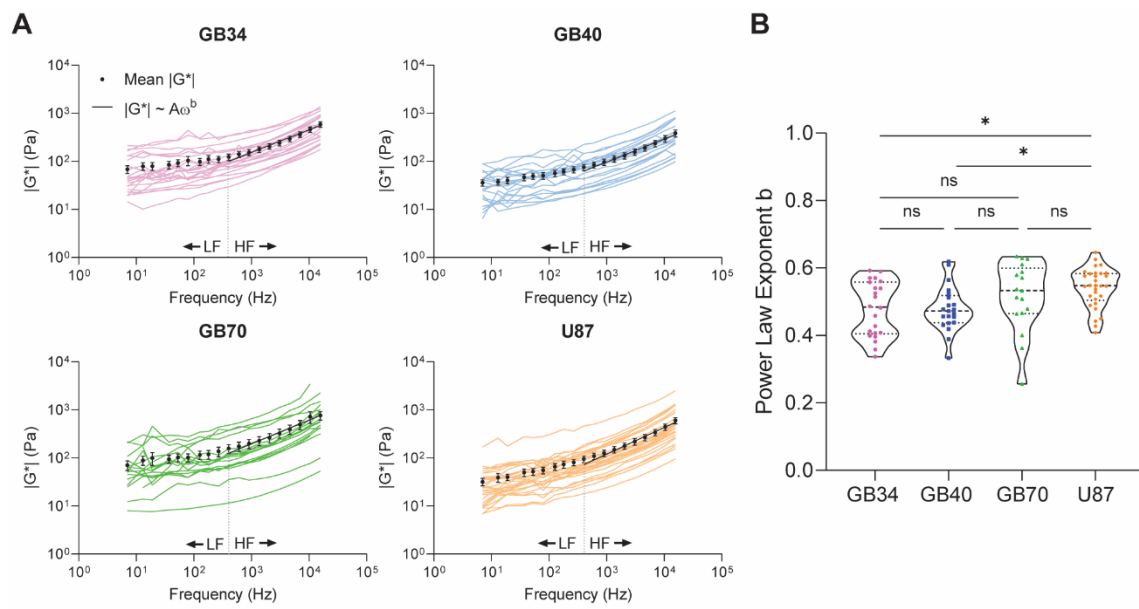

558

559

560 **Figure 3. Single cell analysis demonstrates line-specific power law-dependent rheological**  
561 **profiles.**

562 **A)** Mean  $|G^*(\omega)|$  values for each cell within its respective population accompanied by population  
563 average (mean  $\pm$  s.e.). HF population mean values were fit to the power law  $G^* \sim A\omega^b$ . The power  
564 law coefficients A, exponents b, and 95% confidence intervals are as follows: GB34  $|G^*|$ : A =  
565 5.897 (3.142, 8.652), b = 0.471 (0.4186, 0.5234); GB40  $|G^*|$ : A = 3.545 (1.927, 5.163), b =  
566 0.4782 (0.4271, 0.5293); GB70  $|G^*|$ : A = 6.431 (1.854, 11.01), b = 0.4947 (0.4152, 0.5742); U87  
567  $|G^*|$ : A = 2.593 (0.979, 4.206), b = 0.555 (0.4861, 0.624). **B)** The HF values of individual cells  
568 were fit to the power law  $G^* \sim A\omega^b$ . The exponent b for each cell is displayed, along with median  
569 and first and third quartiles for each line. Significance was determined using a one-way ANOVA  
570 with Tukey's multiple comparisons test. (\* adjusted p value < 0.05)

571

572

573

574

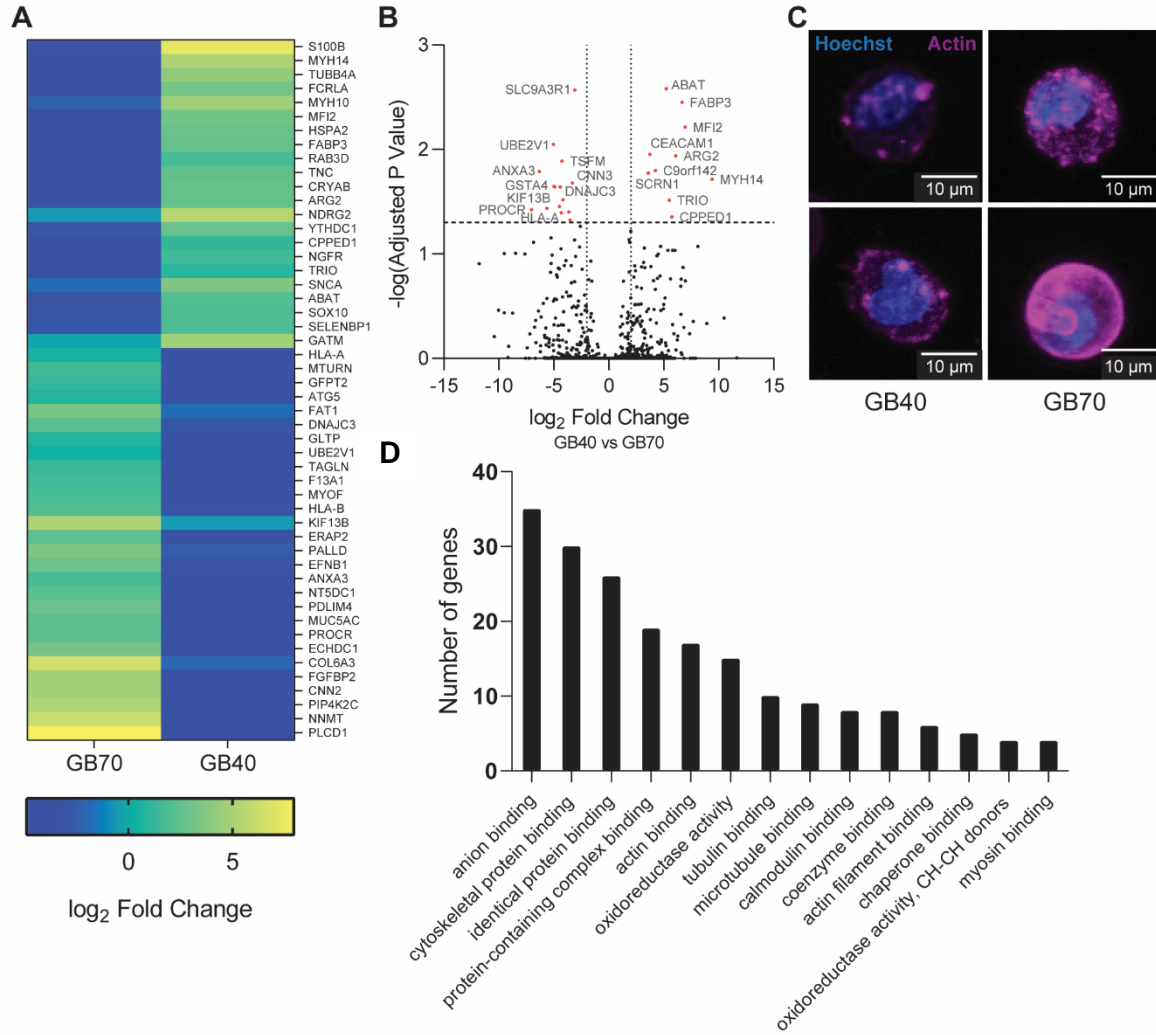

575

576

577 **Figure 4. Primary GBM lines show differential abundance of proteins associated with**  
578 **cytoskeletal organization.**

579 **A)** Mass spectrometry analysis indicates differentially abundant proteins between GB40 and GB70  
580 lines. Heatmap displays top 50 statistically significant ( $p < 0.05$ ) most differentially abundant  
581 proteins. Fold change was determined relative to the global median  $\log_2$  values across all samples.

582 **B)** Volcano plot displaying  $\log_2$  fold change vs the negative logarithm of the adjusted p value,  
583 calculated using the Holm-Sidak method with  $\alpha < 0.05$ . Horizontal line indicates the negative log  
584 of adjusted p value with  $\alpha = 0.05$ . Vertical lines indicate a  $\log_2$  fold change of  $\pm 2$ . **C)**

585 Representative micrographs of cells from GB40 and GB70 lines. Staining includes Hoechst  
586 (nuclei, blue) and phalloidin (actin, magenta). **D)** Pathways enriched in the GB40 line compared

587 to the GB70 line among top 150 most statistically significant differentially abundant proteins.

588 Pathway analysis was limited to Gene Ontology (GO) Function terms with  $FDR < 0.05$ .

589

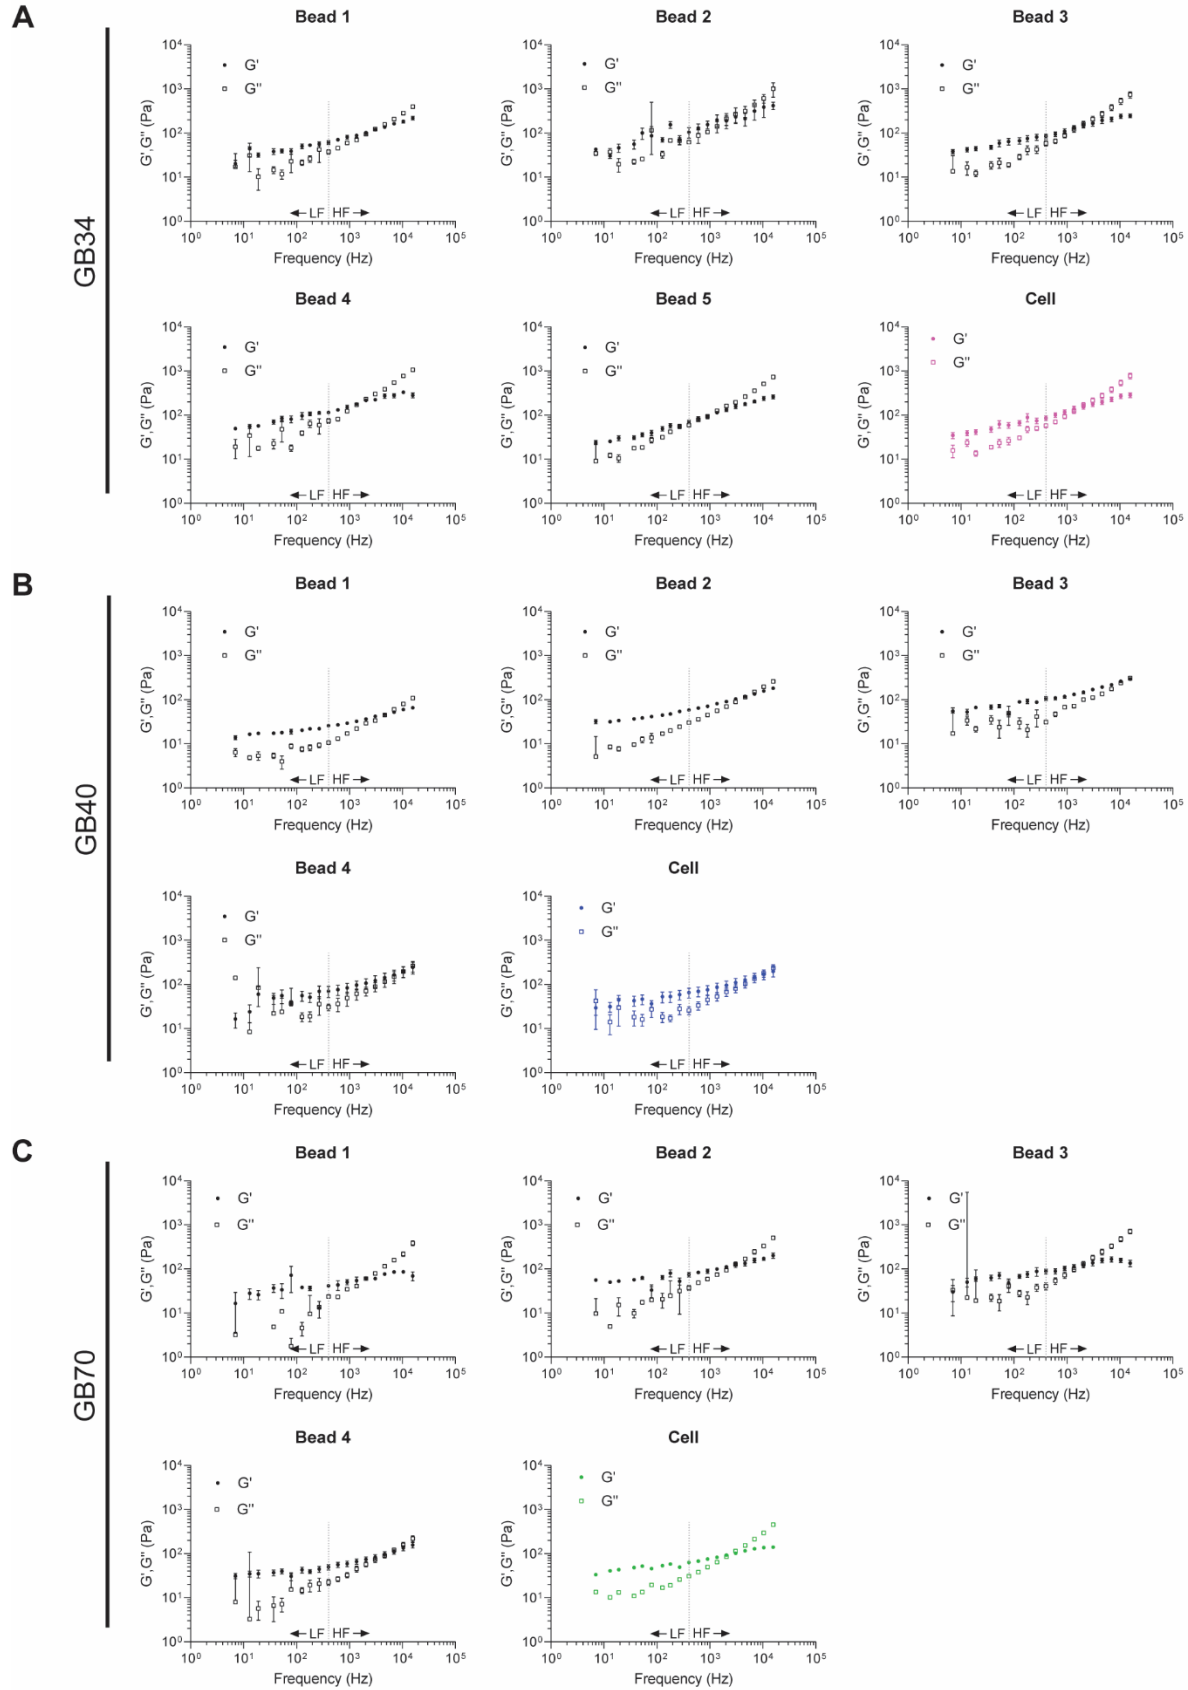



591 **Supplemental Figure 1. Intracellular mechanical heterogeneity in primary GBM cells.**

592 **A-C)** Rheological analysis of representative cells from lines GB34 (**A**), GB40 (**B**), and GB70 (**C**).

593 Bead values for  $G'$  and  $G''$  are the average of individual measurements performed on the bead at

594 each frequency (mean  $\pm$  s.e.,  $n \leq 7$ ), and cell values are the average (mean  $\pm$  s.e.) of the beads

595 displayed. Low frequencies (LF)  $< 400$  Hz. High frequencies (HF)  $>400$  Hz.

596

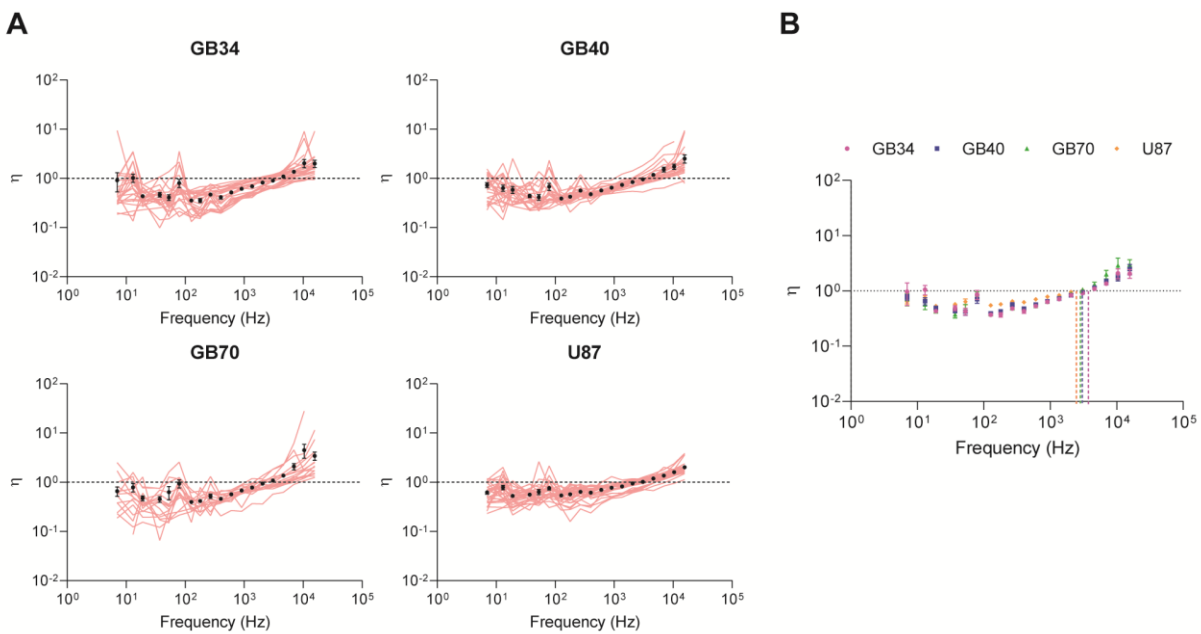

597

598

599 **Supplemental Figure 2. Single cell analysis of hysteresivity ( $\eta$ ) among GBM lines.**

600 **A)** Mean  $\eta(\omega)$  values for each cell within its population, accompanied by the respective population  
601 average (mean  $\pm$  s.e.,  $n \geq 17$  cells). Semifluid materials are described with  $\eta=1$ , while  $\eta=0$  for  
602 purely elastic materials and  $\eta$  is infinite for purely viscous materials. **B)** Population averages for  
603 each GBM line (mean  $\pm$  s.e.). **C)** Pairwise  $\log_2$  ratios of  $\eta(\omega)$  across frequencies comparing all  
604 lines. Significance was determined using a 2-way ANOVA (\*  $p < 0.05$ , \*\*  $p < 0.01$ , \*\*\*  $p < 0.001$ ,  
605 \*\*\*\*  $p < 0.0001$ ).

606

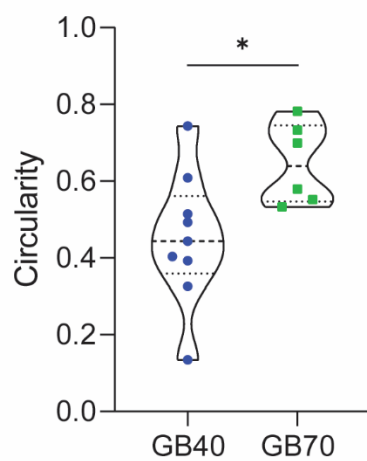

607

608

609 **Supplemental Figure 3. Single cell analysis indicates differences in circularity profiles among**  
610 **primary GBM cell lines.**

611 Circularity measurements were performed on micrographs of cells with phalloidin staining of  
612 actin. A circularity of 1 indicates a perfect sphere. Measurement was performed in FIJI with built-  
613 in circularity plugin according to the formula  $circularity = 4\pi(area/perimeter^2)$ . Significance was  
614 determined using an unpaired, two-tailed Student's *t* test (\*  $p < 0.05$ ).

615

616 References

- 617 1. Aldape, K., et al., *Challenges to curing primary brain tumours*. Nat Rev Clin Oncol, 2019.  
618 **16**(8): p. 509-520.
- 619 2. Jacob, F., et al., *A Patient-Derived Glioblastoma Organoid Model and Biobank*  
620 *Recapitulates Inter- and Intra-tumoral Heterogeneity*. Cell, 2020. **180**(1): p. 188-204 e22.
- 621 3. Neftel, C., et al., *An Integrative Model of Cellular States, Plasticity, and Genetics for*  
622 *Glioblastoma*. Cell, 2019. **178**(4): p. 835-849 e21.
- 623 4. Barnes, J.M., L. Przybyla, and V.M. Weaver, *Tissue mechanics regulate brain*  
624 *development, homeostasis and disease*. J Cell Sci, 2017. **130**(1): p. 71-82.
- 625 5. Dumas, A.A., et al., *Microglia promote glioblastoma via mTOR-mediated*  
626 *immunosuppression of the tumour microenvironment*. EMBO J, 2020: p. e103790.
- 627 6. Gillespie, S. and M. Monje, *An active role for neurons in glioma progression: making*  
628 *sense of Scherer's structures*. Neuro Oncol, 2018. **20**(10): p. 1292-1299.
- 629 7. Pine, A.R., et al., *Tumor Microenvironment Is Critical for the Maintenance of Cellular*  
630 *States Found in Primary Glioblastomas*. Cancer Discov, 2020. **10**(7): p. 964-979.
- 631 8. Jackson, S., et al., *Model systems for studying the blood-brain barrier: Applications and*  
632 *challenges*. Biomaterials, 2019. **214**: p. 119217.
- 633 9. Tanner, K., *Perspective: The role of mechanobiology in the etiology of brain metastasis*.  
634 APL Bioeng, 2018. **2**(3): p. 031801.
- 635 10. Liu, C.J., et al., *Glioma Cell Migration Dynamics in Brain Tissue Assessed by Multimodal*  
636 *Optical Imaging*. Biophys J, 2019. **117**(7): p. 1179-1188.
- 637 11. Rezk, R., et al., *Spatial heterogeneity of cell-matrix adhesive forces predicts human*  
638 *glioblastoma migration*. bioRxiv, 2020: p. 2020.05.06.080804.
- 639 12. Nia, H.T., et al., *Solid stress and elastic energy as measures of tumour*  
640 *mechanopathology*. Nature Biomedical Engineering, 2016. **1**(1): p. 0004.
- 641 13. Pegoraro, A.F., P. Janmey, and D.A. Weitz, *Mechanical Properties of the Cytoskeleton*  
642 *and Cells*. Cold Spring Harb Perspect Biol, 2017. **9**(11).
- 643 14. Urbanska, M., et al., *Single-cell mechanical phenotype is an intrinsic marker of*  
644 *reprogramming and differentiation along the mouse neural lineage*. Development, 2017.  
645 **144**(23): p. 4313-4321.
- 646 15. Wu, P.H., et al., *A comparison of methods to assess cell mechanical properties*. Nat  
647 Methods, 2018. **15**(7): p. 491-498.
- 648 16. Staunton, J.R., et al., *High-frequency microrheology in 3D reveals mismatch between*  
649 *cytoskeletal and extracellular matrix mechanics*. Proc Natl Acad Sci U S A, 2019. **116**(29):  
650 p. 14448-14455.
- 651 17. Mathieu, S. and J.B. Manneville, *Intracellular mechanics: connecting rheology and*  
652 *mechanotransduction*. Curr Opin Cell Biol, 2019. **56**: p. 34-44.
- 653 18. Streitberger, K.-J., et al., *How tissue fluidity influences brain tumor progression*.  
654 Proceedings of the National Academy of Sciences, 2020. **117**(1): p. 128-134.
- 655 19. Streitberger, K.J., et al., *High-resolution mechanical imaging of glioblastoma by*  
656 *multifrequency magnetic resonance elastography*. PLoS One, 2014. **9**(10): p. e110588.
- 657 20. Bunevicius, A., et al., *REVIEW: MR elastography of brain tumors*. Neuroimage Clin, 2020.  
658 **25**: p. 102109.

- 659 21. Pepin, K.M., et al., *MR Elastography Analysis of Glioma Stiffness and IDH1-Mutation*  
660 *Status*. AJNR Am J Neuroradiol, 2018. **39**(1): p. 31-36.
- 661 22. Blehm, B.H., et al., *In vivo tissue has non-linear rheological behavior distinct from 3D*  
662 *biomimetic hydrogels, as determined by AMOTIV microscopy*. Biomaterials, 2016. **83**: p.  
663 66-78.
- 664 23. Neuman, K.C. and S.M. Block, *Optical trapping*. Rev Sci Instrum, 2004. **75**(9): p. 2787-  
665 809.
- 666 24. Staunton, J.R., et al., *In situ calibration of position detection in an optical trap for active*  
667 *microrheology in viscous materials*. Opt Express, 2017. **25**(3): p. 1746-1761.
- 668 25. Trepap, X., G. Lenormand, and J.J. Fredberg, *Universality in cell mechanics*. Soft Matter,  
669 2008. **4**(9): p. 1750-1759.
- 670 26. Golomb, E., et al., *Identification and characterization of nonmuscle myosin II-C, a new*  
671 *member of the myosin II family*. J Biol Chem, 2004. **279**(4): p. 2800-8.
- 672 27. Wylie, S.R. and P.D. Chantler, *Myosin IIC: a third molecular motor driving neuronal*  
673 *dynamics*. Mol Biol Cell, 2008. **19**(9): p. 3956-68.
- 674 28. Stupp, R., et al., *High-grade glioma: ESMO Clinical Practice Guidelines for diagnosis,*  
675 *treatment and follow-up*. Ann Oncol, 2014. **25 Suppl 3**: p. iii93-101.
- 676 29. Bhaduri, A., et al., *Outer Radial Glia-like Cancer Stem Cells Contribute to Heterogeneity*  
677 *of Glioblastoma*. Cell Stem Cell, 2020. **26**(1): p. 48-63 e6.
- 678 30. Arbore, C., et al., *Probing force in living cells with optical tweezers: from single-molecule*  
679 *mechanics to cell mechanotransduction*. Biophys Rev, 2019. **11**(5): p. 765-782.
- 680 31. Antonacci, G., et al., *Recent progress and current opinions in Brillouin microscopy for life*  
681 *science applications*. Biophys Rev, 2020. **12**(3): p. 615-624.
- 682 32. Guck, J., et al., *The optical stretcher: a novel laser tool to micromanipulate cells*. Biophys  
683 J, 2001. **81**(2): p. 767-84.
- 684 33. Munder, M.C., et al., *A pH-driven transition of the cytoplasm from a fluid- to a solid-like*  
685 *state promotes entry into dormancy*. Elife, 2016. **5**.
- 686 34. Nikolic, M. and G. Scarcelli, *Long-term Brillouin imaging of live cells with reduced*  
687 *absorption-mediated damage at 660 nm wavelength*. Biomed Opt Express, 2019. **10**(4):  
688 p. 1567-1580.
- 689 35. Lu, Y.B., et al., *Viscoelastic properties of individual glial cells and neurons in the CNS*.  
690 Proc Natl Acad Sci U S A, 2006. **103**(47): p. 17759-64.
- 691 36. Mandal, K., et al., *Mapping intracellular mechanics on micropatterned substrates*. Proc  
692 Natl Acad Sci U S A, 2016. **113**(46): p. E7159-E7168.
- 693 37. Balland, M., et al., *Power laws in microrheology experiments on living cells: Comparative*  
694 *analysis and modeling*. Phys Rev E Stat Nonlin Soft Matter Phys, 2006. **74**(2 Pt 1): p.  
695 021911.
- 696 38. Fabry, B., et al., *Scaling the microrheology of living cells*. Phys Rev Lett, 2001. **87**(14): p.  
697 148102.
- 698 39. Kasza, K.E., et al., *The cell as a material*. Curr Opin Cell Biol, 2007. **19**(1): p. 101-7.
- 699 40. Rigato, A., et al., *High-frequency microrheology reveals cytoskeleton dynamics in living*  
700 *cells*. Nat Phys, 2017. **13**(8): p. 771-775.
- 701 41. Broedersz, C.P. and F.C. MacKintosh, *Modeling semiflexible polymer networks*. Reviews  
702 of Modern Physics, 2014. **86**(3): p. 995-1036.

- 703 42. de Sousa, J.S., et al., *Double power-law viscoelastic relaxation of living cells encodes*  
704 *motility trends*. Sci Rep, 2020. **10**(1): p. 4749.
- 705 43. Ivkovic, S., et al., *Direct inhibition of myosin II effectively blocks glioma invasion in the*  
706 *presence of multiple motogens*. Mol Biol Cell, 2012. **23**(4): p. 533-42.
- 707 44. Beadle, C., et al., *The role of myosin II in glioma invasion of the brain*. Mol Biol Cell, 2008.  
708 **19**(8): p. 3357-68.
- 709 45. Picariello, H.S., et al., *Myosin IIA suppresses glioblastoma development in a mechanically*  
710 *sensitive manner*. Proc Natl Acad Sci U S A, 2019. **116**(31): p. 15550-15559.
- 711 46. Lee, W., S. Lim, and Y. Kim, *The role of myosin II in glioma invasion: A mathematical*  
712 *model*. PLoS One, 2017. **12**(2): p. e0171312.
- 713 47. Galli, R., et al., *Isolation and characterization of tumorigenic, stem-like neural precursors*  
714 *from human glioblastoma*. Cancer Res, 2004. **64**(19): p. 7011-21.
- 715 48. Paul, C.D., et al., *Probing cellular response to topography in three dimensions*.  
716 Biomaterials, 2019. **197**: p. 101-118.
- 717 49. Wisniewski, J.R., et al., *Universal sample preparation method for proteome analysis*. Nat  
718 Methods, 2009. **6**(5): p. 359-62.
- 719 50. Cox, J., et al., *Accurate proteome-wide label-free quantification by delayed normalization*  
720 *and maximal peptide ratio extraction, termed MaxLFQ*. Mol Cell Proteomics, 2014.  
721 **13**(9): p. 2513-26.
- 722 51. Cox, J. and M. Mann, *MaxQuant enables high peptide identification rates, individualized*  
723 *p.p.b.-range mass accuracies and proteome-wide protein quantification*. Nat Biotechnol,  
724 2008. **26**(12): p. 1367-72.
- 725 52. Tyanova, S., et al., *The Perseus computational platform for comprehensive analysis of*  
726 *(prote)omics data*. Nat Methods, 2016. **13**(9): p. 731-40.
- 727 53. Fischer, M., et al., *Active-passive calibration of optical tweezers in viscoelastic media*.  
728 Review of Scientific Instruments, 2010. **81**(1): p. 015103.
- 729 54. Fischer, M.B.-S., K., *Calibration of trapping force and response function of optical*  
730 *tweezers in viscoelastic media*. 2007. **9**(8).
- 731 55. Berg-Sørensen, K. and H. Flyvbjerg, *Power spectrum analysis for optical tweezers*.  
732 Review of Scientific Instruments, 2004. **75**(3): p. 594-612.
- 733 56. Berg-Sørensen, K., et al., *Power spectrum analysis for optical tweezers. II: Laser*  
734 *wavelength dependence of parasitic filtering, and how to achieve high bandwidth*.  
735 Review of Scientific Instruments, 2006. **77**(6): p. 063106.
- 736 57. Tolić-Nørrelykke, S.F., et al., *Calibration of optical tweezers with positional detection in*  
737 *the back focal plane*. Review of Scientific Instruments, 2006. **77**(10): p. 103101.  
738
